# Supplementary material
Source: publisher figshare collection journal article supplement (https://wiley.figshare.com/articles/dataset/_/3567843)
Supplement: Supplementary file 2 [file 1 › appendix-A.htm]

Ecological Archives M081-023-A1


### *Ecological Archives* A/E/M000-000-A1

### Steven C. Walker and Donald A. Jackson. 2011. Random-effects ordination: describing and predicting multivariate correlations and co-occurrences. *Ecological Monographs* 81:635–663.

Appendix A. Mathematical details of random-effects ordination.

> View / download PDF.

---


[Back to A/E/M000-000]
